# Supplementary material
Source: publisher figshare collection journal article supplement (https://future-science-group.figshare.com/ndownloader/files/41254605)
Supplement: Supplementary file 1 [file 41254605]

Table S1 Changes in the patient's cerebrospinal fluid

| **Days**  **(s)** | **WBC Count**  **（×106/L）** | **CSF（%）** | | **CSF biochemical analysis** | |
| --- | --- | --- | --- | --- | --- |
| D 17 | 345100 | N | 90 | Pro (g/L) |  |
|  | L | 6 | Glu (mmol/L) |  |
|  | M | 1 | Cl （mmol/L） |  |
| D 19 | 272800 | N | 95 | Pro | 15.3 |
|  | L | 1 | Glu | 0.2 |
|  | M | 4 | Cl | 108.4 |
| D 22 | 352000 | N | 96 | Pro | 14.4 |
|  | L | 2 | Glu | 0.1 |
|  | M | 1 | Cl | 113.3 |
| D 23 |  | N |  | Pro | 17.5 |
|  | L |  | Glu | 2.2 |
|  | M |  | Cl | 112.2 |
| D 24 |  | N |  | Pro | 16.4 |
|  | L |  | Glu | 0.2 |
|  | M |  | Cl | 103.3 |
| D 25 | 226100 | N | 98 | Pro | 12.7 |
|  | L | 1 | Glu | 2 |
|  | M | 1 | Cl | 108.3 |
| D 26 | 21100 | N | 97 | Pro | 3.9 |
|  | L | 2 | Glu | 0.3 |
|  | M | 1 | Cl | 105.8 |
| D 27 | 1040 | N | 93 | Pro | 5.9 |
|  | L | 1 | Glu | 2.6 |
|  | M | 5 | Cl | 104.4 |
| D 29 | 1840 | N | 93 | Pro | 9.2 |
|  | L | 4 | Glu | 0.7 |
|  | M | 2 | Cl | 105.1 |
| D 30 | 230 | N | 87 | Pro | 6.5 |
|  | L | 7 | Glu | 2 |
|  | M | 3 | Cl | 108.1 |
| D 31 | 420 | N | 95 | Pro | 7.0 |
|  | L | 4 | Glu | 0.7 |
|  | M | 1 | Cl | 103.8 |
| D 32 | 351 | N | 96 | Pro | 3.5 |
|  | L | 1 | Glu | 0.8 |
|  | M | 3 | Cl | 103.8 |
| D 33 | 220 | N | 81 | Pro | 4.8 |
|  | L | 17 | Glu | 0.8 |
|  | M | 2 | Cl | 104.9 |

Abbreviations: CSF, cerebrospinal fluid; WBC, white blood cell；

N, neutrophils; L: lymphocytes; M: monocytes; pro, protein; cl, chloride; Glu, glucose;

D(Day), days after craniotomy
